# Supplementary material
Source: Springer Nature journal article supplement (https://www.springermedizin.de/resource/supplementary/12961_2014_361_MOESM2_ESM.pdf/9571136)

**A: YLL Norway**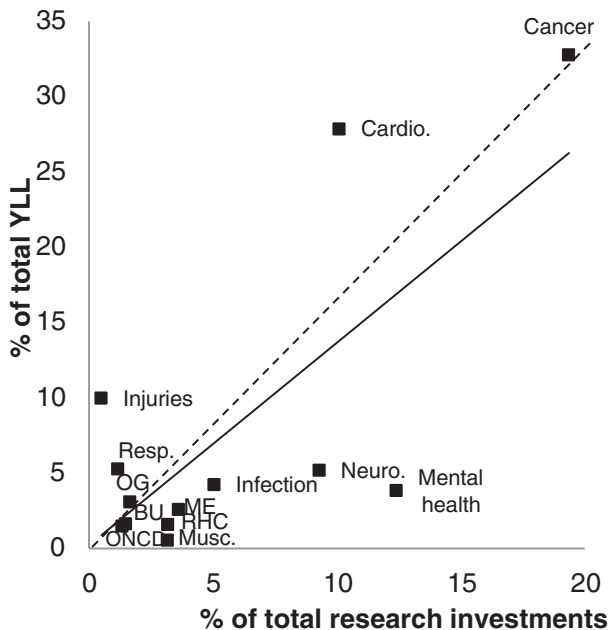**B: DALYs Norway**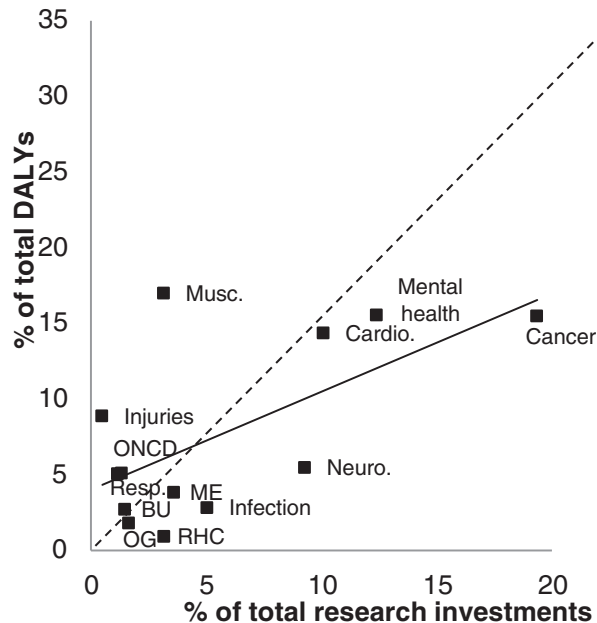**C: YLL global**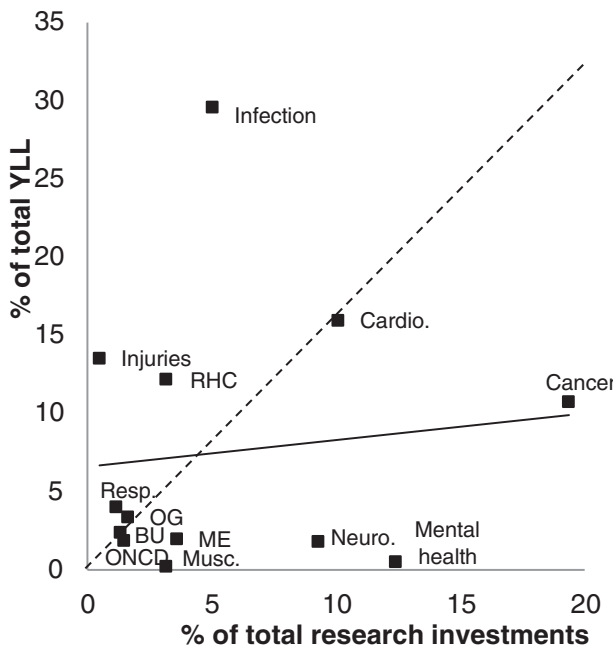**D: DALYs global**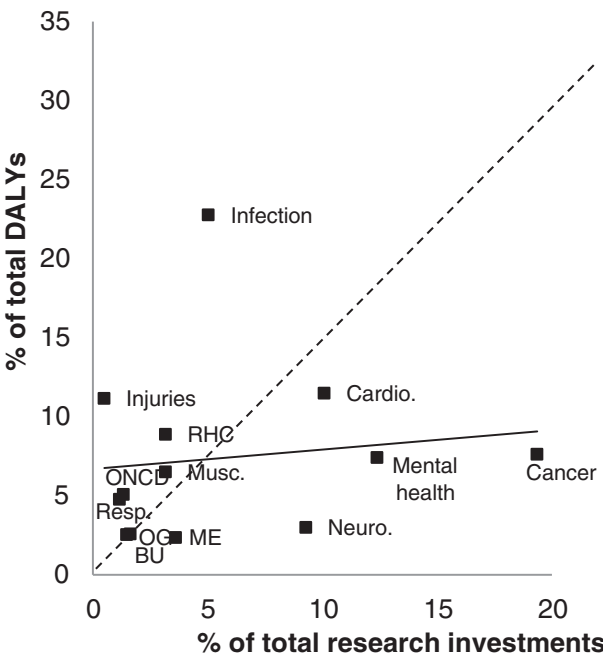

Supplement: MOESM2 [file 9571136]
